# Supplementary material for: Short- vs. long-range elastic distortion: structural dynamics of a [2 × 2] tetrairon(ii) spin crossover grid complex observed by time-resolved X-Ray crystallography
Source: Royal Society of Chemistry journal article supplement (doi:10.1039/d2dt02638d), 2022-01-01
Supplement: d2dt02638d1.pdf [file d2dt02638d1.pdf]

# Short- vs Long-range Elastic Distortion: Structural Dynamics of a [2x2] Tetrairon (II) Spin Crossover Grid Complex Observed by Time-Resolved X-Ray Crystallography

Jose de Jesus Velazquez-Garcia<sup>a\*</sup>, Krishnayan Basuroy<sup>a</sup>, Darina Storozhuk<sup>a</sup>, Joanne Wong<sup>b</sup>, Serhiy Demeshko<sup>b</sup>, Franc Meyer<sup>b</sup>, Robert Henning<sup>c</sup> and Simone Techert<sup>ad</sup>

<sup>a</sup>Photon Science - Structural Dynamics in Chemical Systems, Deutsches Elektronen-Synchrotron DESY, Notkestraße 85, Hamburg, 22607, Germany

<sup>b</sup>Institut für Anorganische Chemie, Georg-August-Universität Göttingen, Tammannstraße 4, Göttingen, 37077, Germany

<sup>c</sup>Center for Advanced Radiation Sources, The University of Chicago, Argonne National Laboratory, 9700 South Cass Ave, Lemont, Illinois, 90439, USA

<sup>d</sup>Institut für Röntgenphysik, Georg-August-Universität Göttingen, Friedrich-Hund-Platz 1, Göttingen, 37077, Germany

## Synthesis

The complex grid **FE4** and its ligand were synthesized following the procedure reported in literature<sup>1</sup>. The crystallographic data for this paper can be obtained free of charge from The Cambridge Crystallographic Data Centre via [www.ccdc.cam.ac.uk/data\\_request/cif](http://www.ccdc.cam.ac.uk/data_request/cif). Deposition numbers: 2195543-2195550, 2195552-2195555, 2195574-2195582.

## Ortep plots

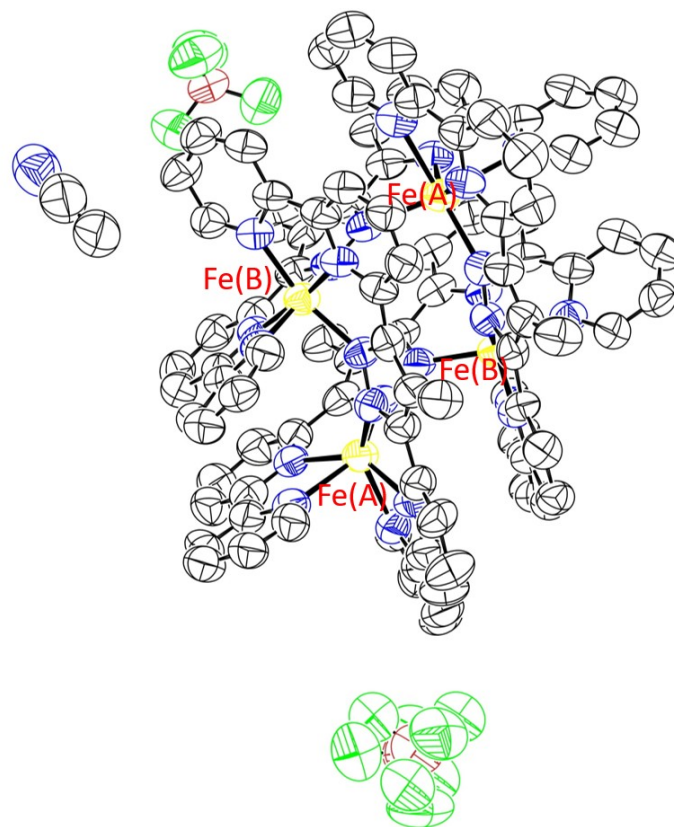

Figure S1. Thermal ellipsoid plot (50% of probability) for **FE4** for the -200ps data.

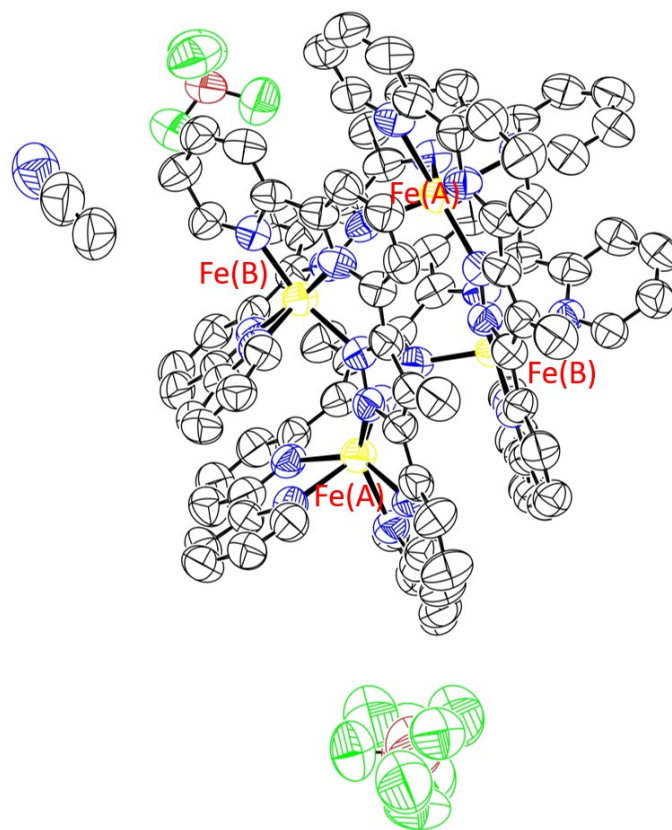

Figure S2. Thermal ellipsoid plot (50% of probability) for **FE4** for the 100ps data.

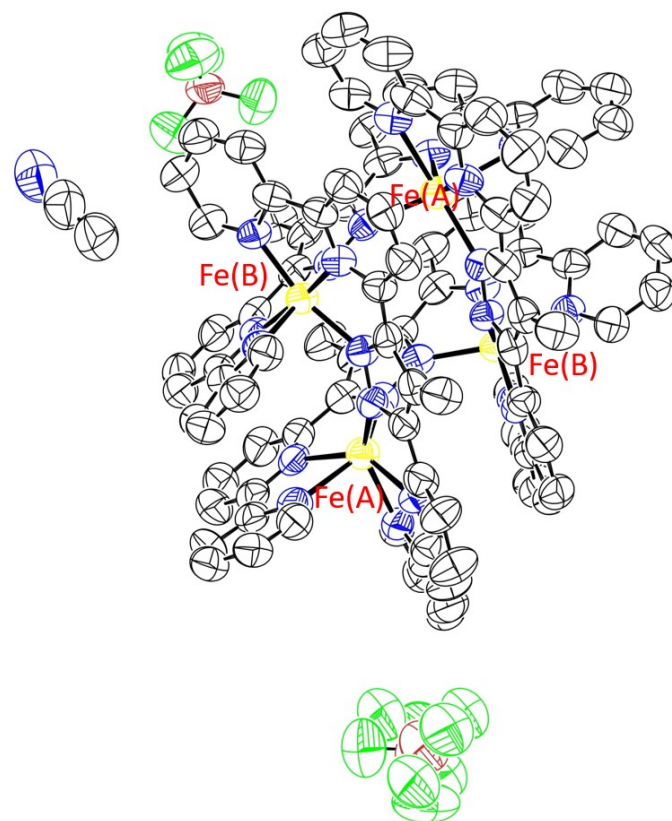

Figure S3. Thermal ellipsoid plot (50% of probability) for **FE4** for the 200ps data.

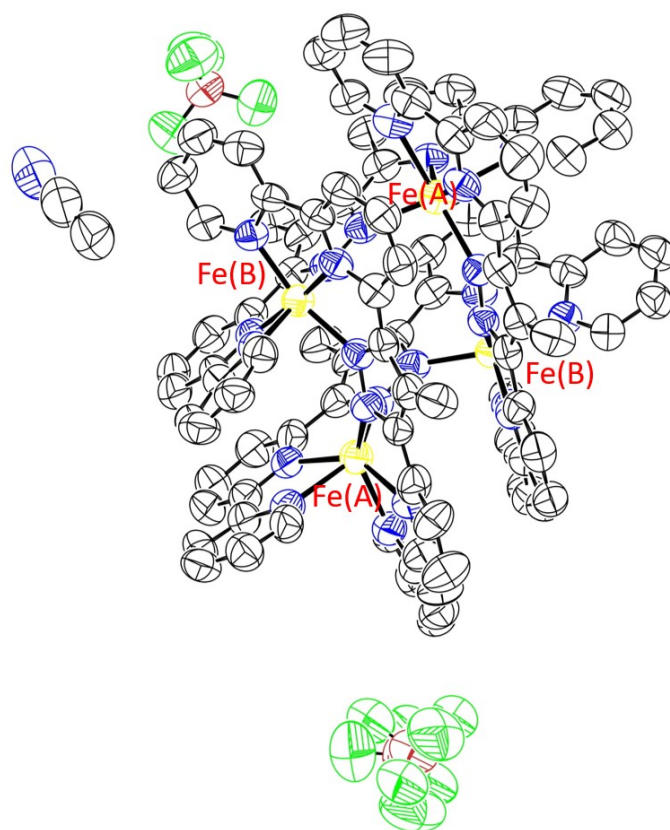

Figure S4. Thermal ellipsoid plot (50% of probability) for **FE4** for the 300ps data.

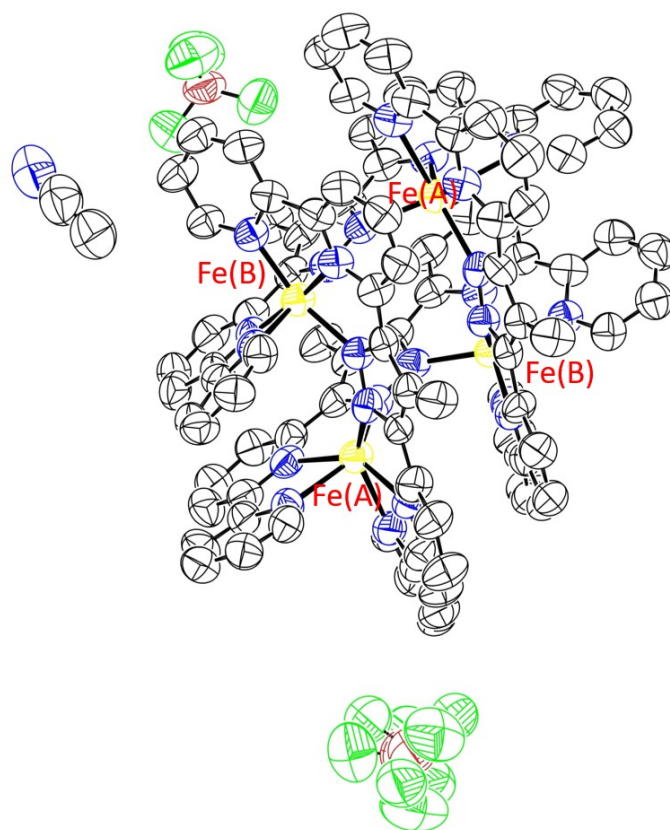

Figure S5. Thermal ellipsoid plot (50% of probability) for **FE4** for the 400ps data.

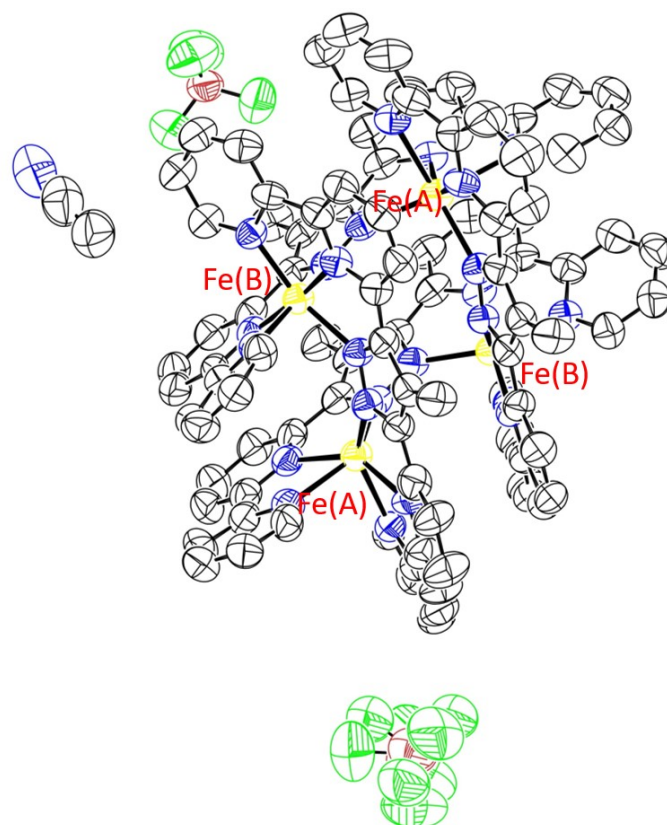

Figure S6. Thermal ellipsoid plot (50% of probability) for **FE4** for the 500ps data.

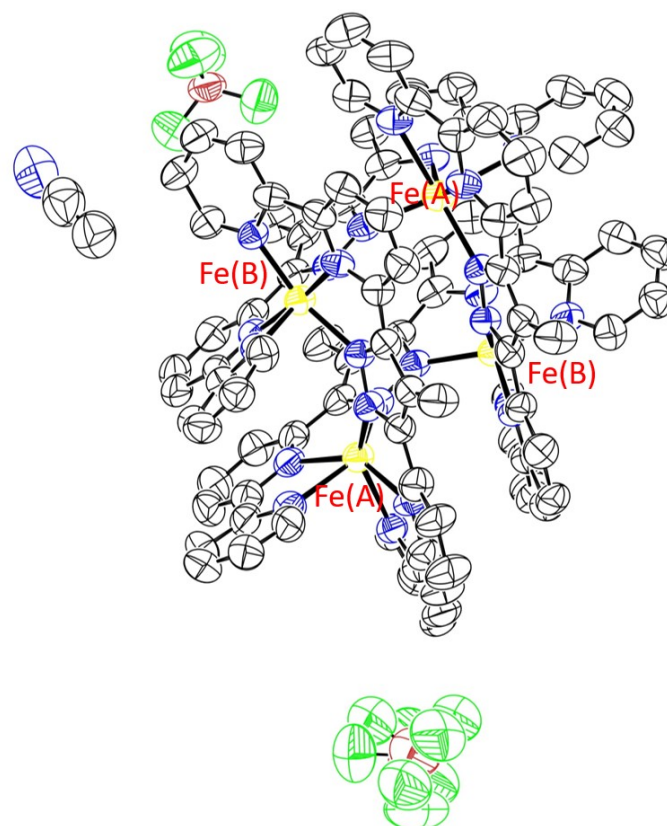

Figure S7. Thermal ellipsoid plot (50% of probability) for **FE4** for the 600ps data.



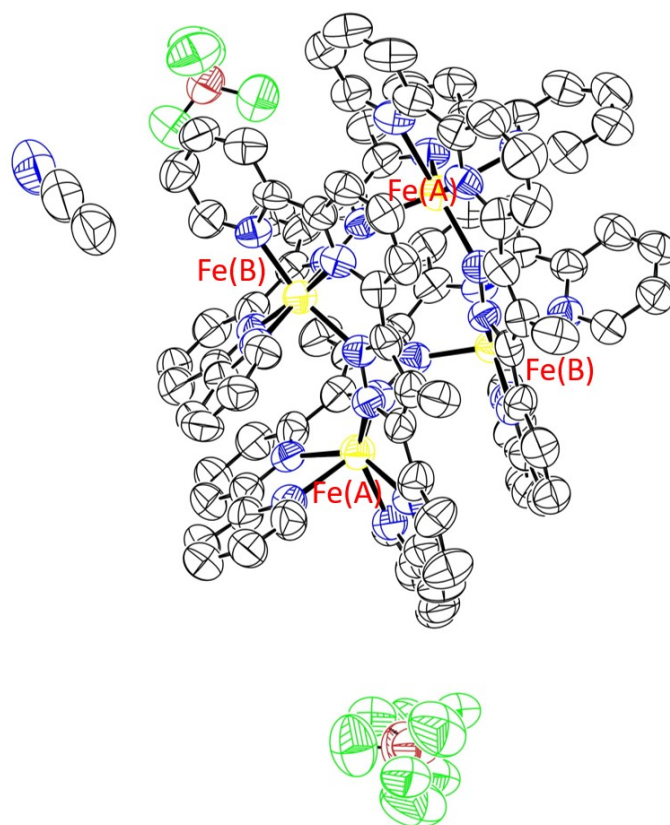

Figure S8. Thermal ellipsoid plot (50% of probability) for **FE4** for the 700ps data.

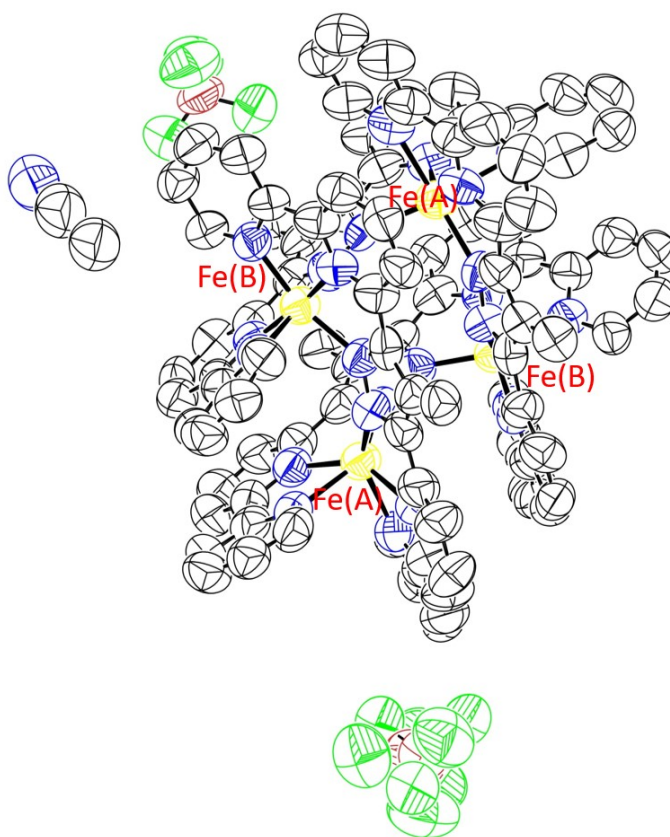

Figure S9. Thermal ellipsoid plot (50% of probability) for **FE4** for the 800ps data.

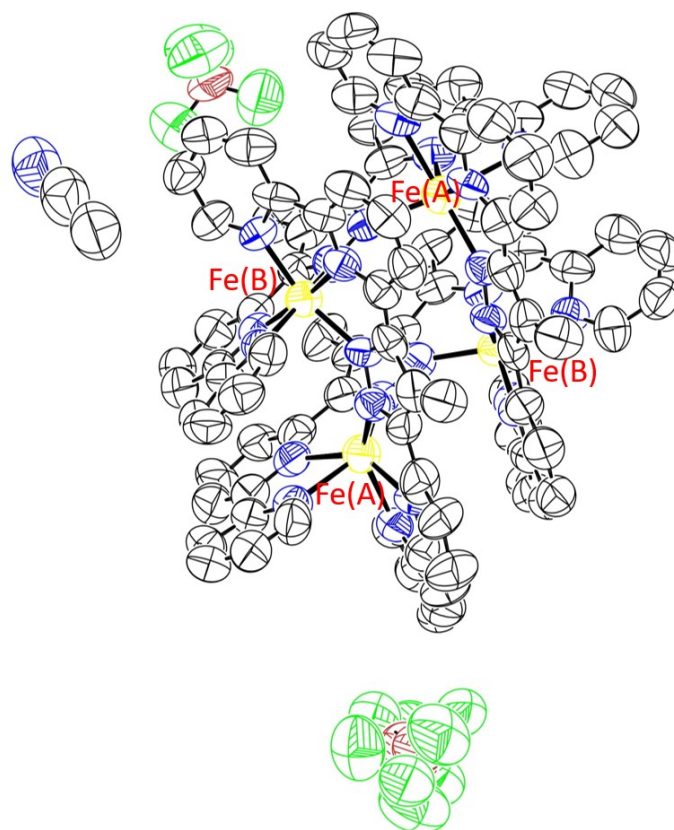

Figure S10. Thermal ellipsoid plot (50% of probability) for **FE4** for the 900ps data.

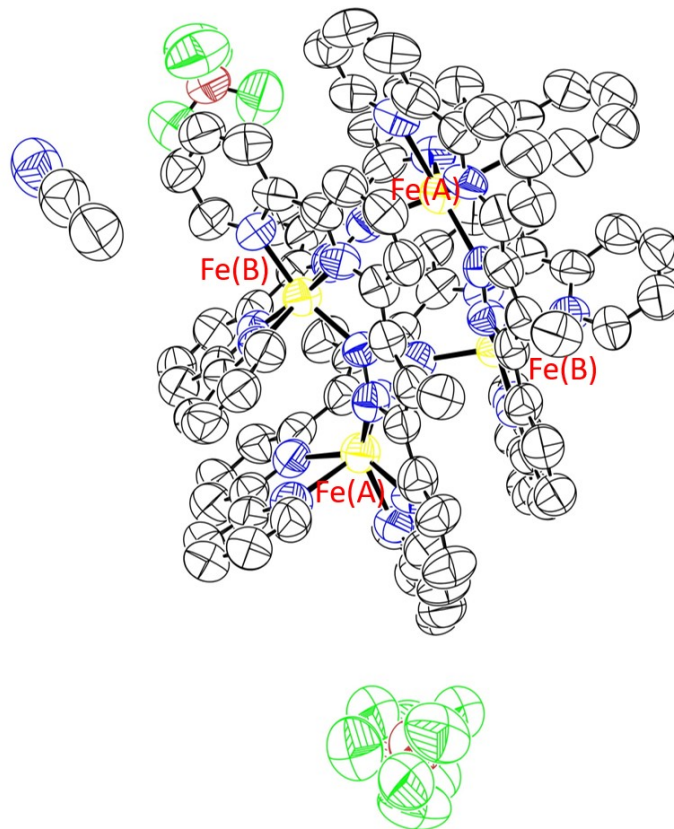

Figure S11. Thermal ellipsoid plot (50% of probability) for **FE4** for the 1ns data.

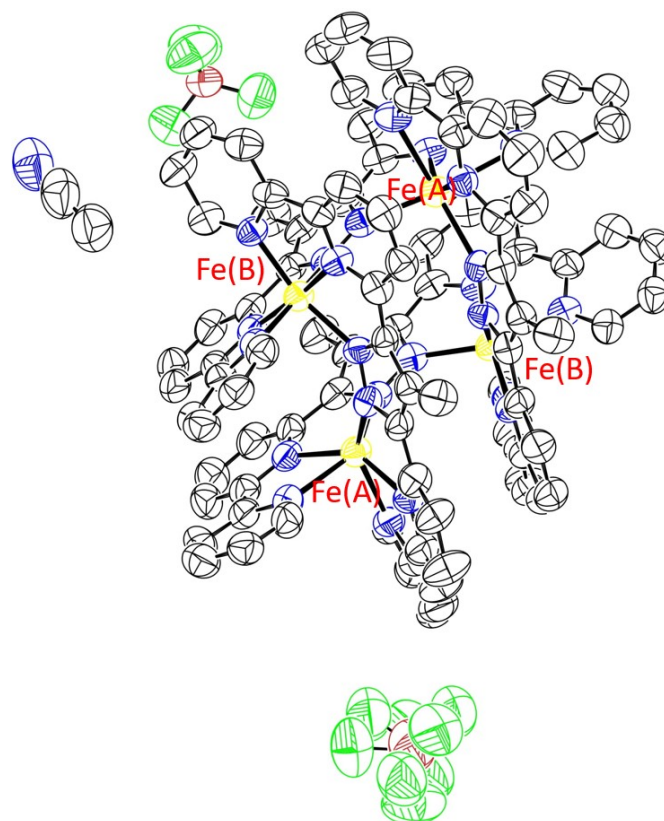

Figure S12. Thermal ellipsoid plot (50% of probability) for **FE4** for the 10 $ns$  data.

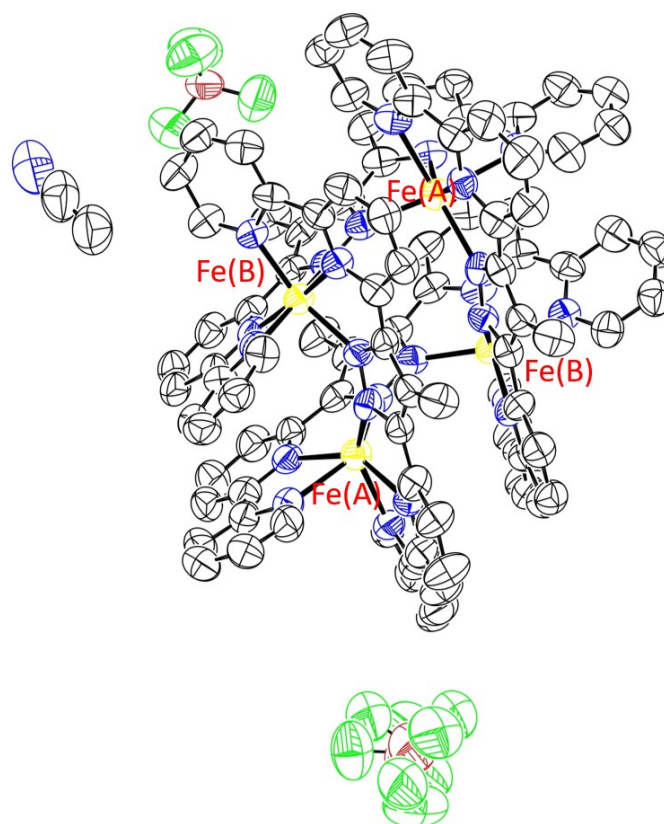

Figure S13. Thermal ellipsoid plot (50% of probability) for **FE4** for the 50 $ns$  data.

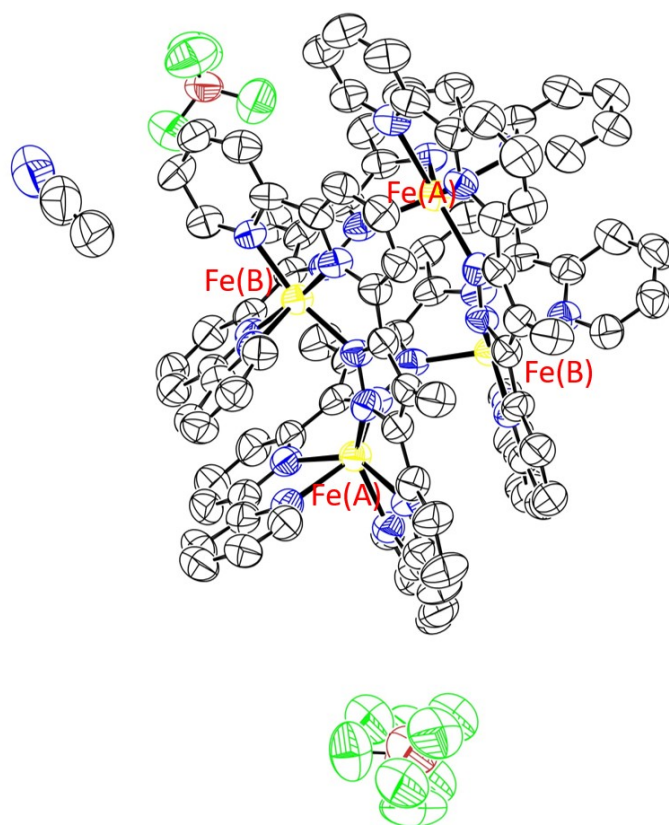

Figure S14. Thermal ellipsoid plot (50% of probability) for **FE4** for the 100 $ns$  data.

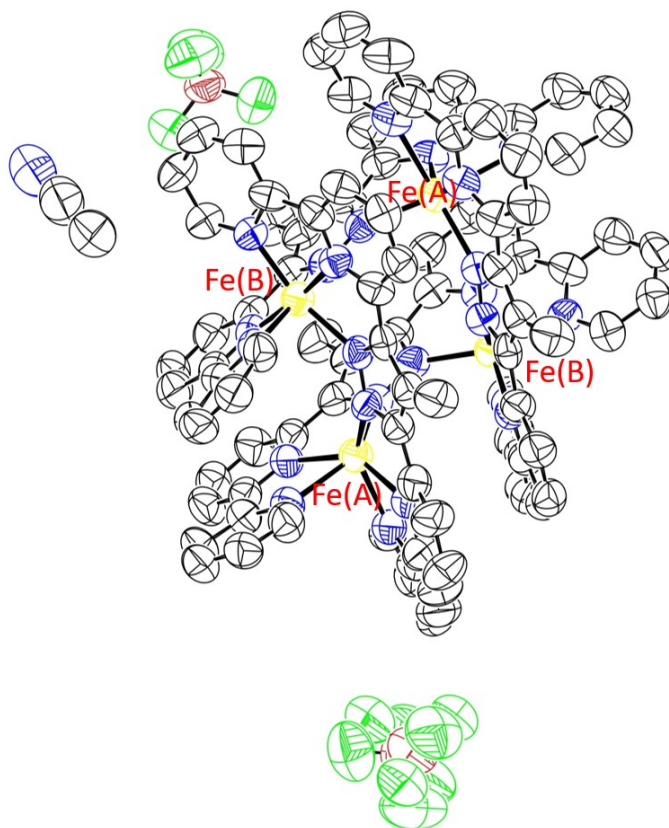

Figure S15. Thermal ellipsoid plot (50% of probability) for **FE4** for the 200 $ns$  data.



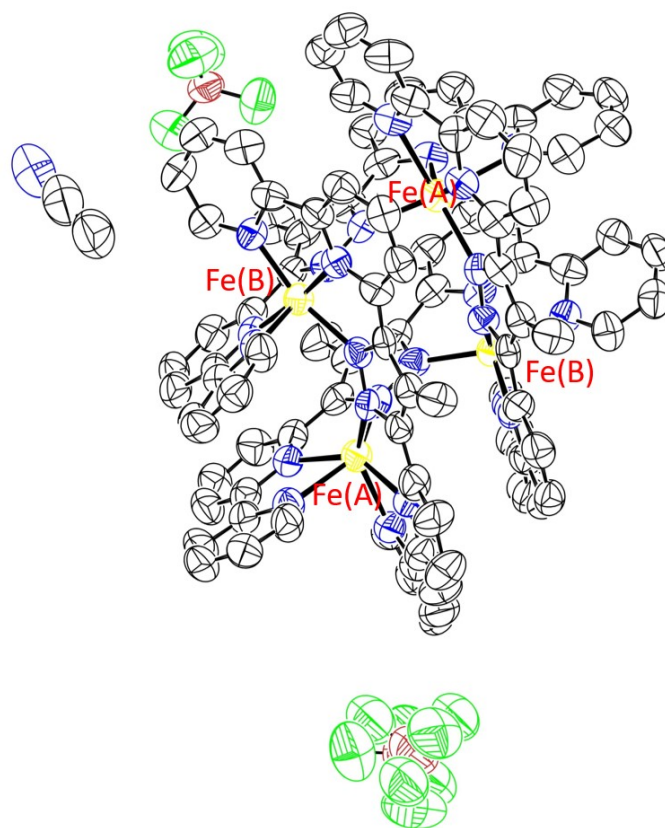

Figure S16. Thermal ellipsoid plot (50% of probability) for **FE4** for the 500 $ns$  data.

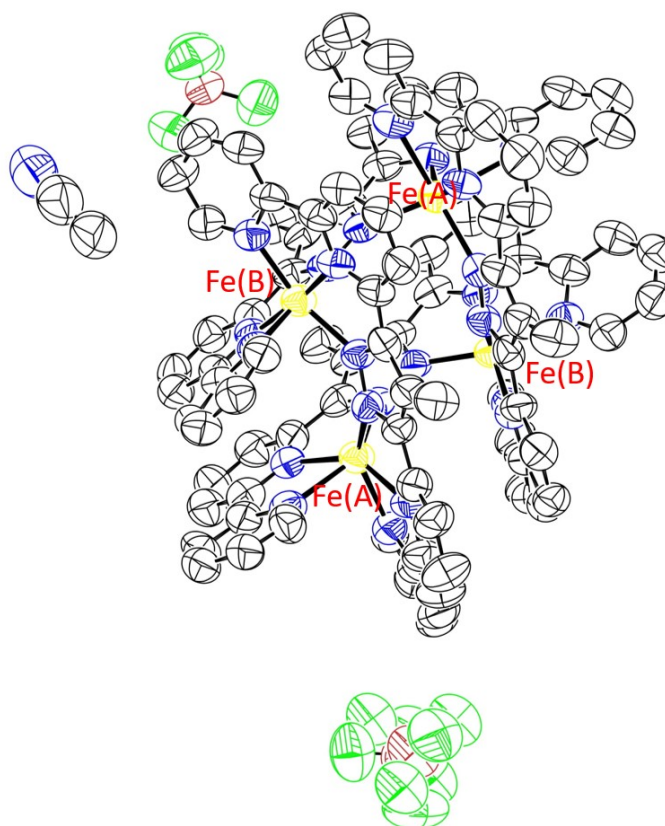

Figure S17. Thermal ellipsoid plot (50% of probability) for **FE4** for the 800 $ns$  data.

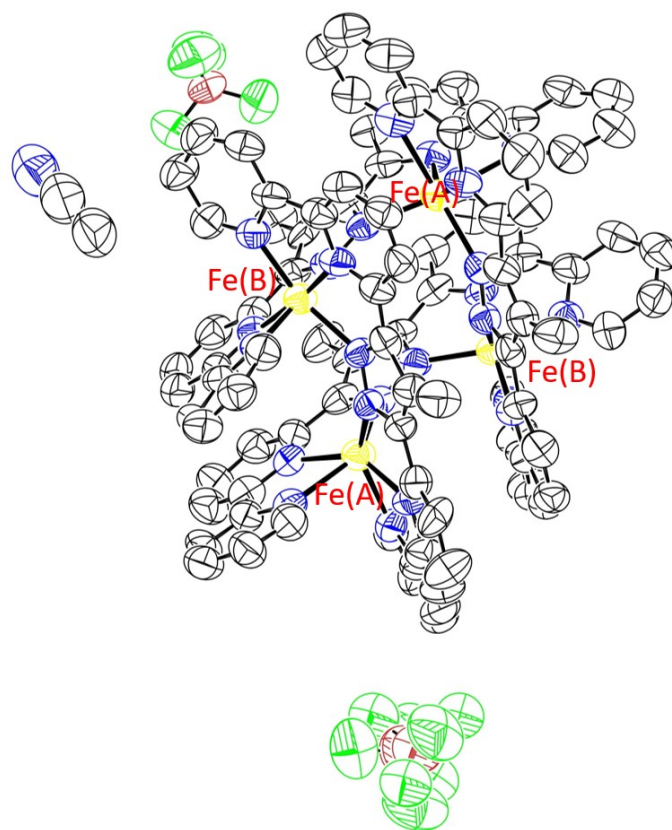

Figure S18. Thermal ellipsoid plot (50% of probability) for **FE4** for the  $1\mu s$  data.

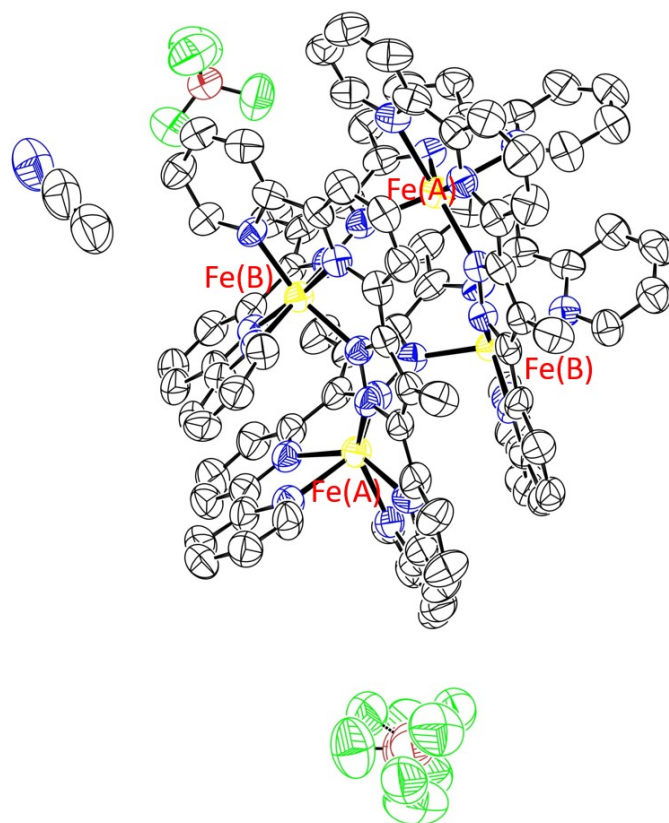

Figure S19. Thermal ellipsoid plot (50% of probability) for **FE4** for the  $10\mu s$  data.

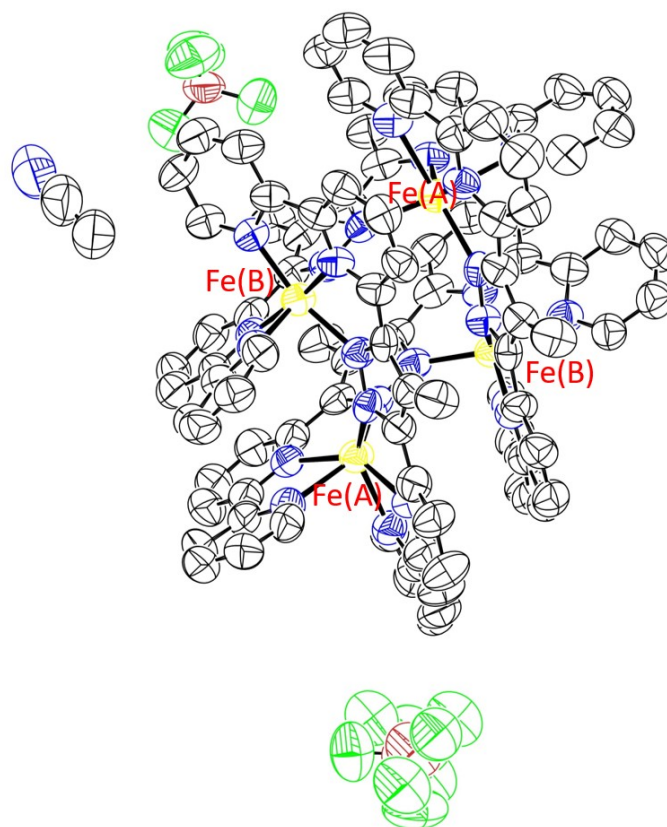

Figure S20. Thermal ellipsoid plot (50% of probability) for **FE4** for the 50 $\mu$ s data.

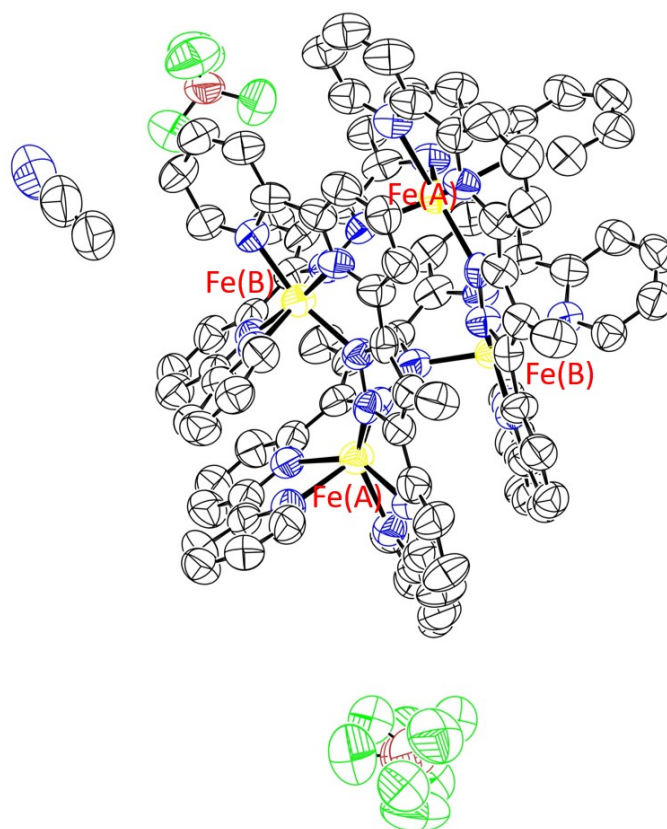

Figure S21. Thermal ellipsoid plot (50% of probability) for **FE4** for the 100 $\mu$ s data.

## Structural Analysis

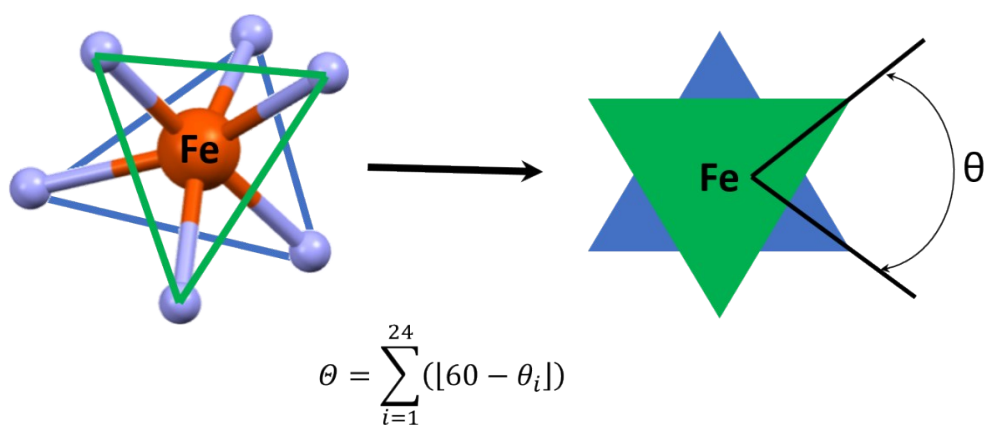

Figure S22. Environment of  $\text{Fe}^{\text{II}}$  ions and definition of the  $\theta$  angle and the angular distortion parameter  $(\Theta)$ .<sup>2,3</sup>



## Temperature difference

The well-known Wilson plot<sup>4</sup> is frequently used to estimate the scale factor,  $k_s$ , and the overall isotropic temperature factor ( $B$ ) of a data set. This plot can be obtained by statistical comparison of the observed

intensities ( $I_{obs}$ ) with the average squared structure factor equals  $\sum_{i=1}^M f_i^2$  for each  $\sin \theta/\lambda$  range according to:

$$\ln \left( \frac{I_{obs}}{\sum_{i=1}^M f_i^2} \right) = \ln(k_s) - 2B(\sin \theta/\lambda)^2 \quad (S1)$$

Where  $M$  is the number of atoms and  $f_i$  is the scattering factor of the  $i$ th atom.

The change in the overall isotropic temperature factor ( $\Delta B$ ) between two data sets at different temperature can be estimated from modified Wilson plots. The plots are obtained by a scale-factor refinement of the low temperature data (e.g. 220K) with the high-temperature data (e.g. 250K) structural model and plotting the  $\ln(I^{250K}/I^{220K})$ . The slope of the dependence of  $\ln(I^{250K}/I^{220K})$  with  $(\sin \theta/\lambda)^2$  gives the overall increase of isotropic atomic motion,  $\Delta B$  (equation S2), which is associated with temperature difference between the data sets.<sup>5</sup>

$$\ln \left( \frac{I^{250K}}{I^{220K}} \right) = -2\Delta B^{250K-220K}(\sin \theta/\lambda)^2 \quad (S2)$$

The greater the temperature difference between data sets the greater the value of  $\Delta B$ , that means a more negative slope of the plot. This feature is used to analyse the temperature increase during the photo-crystallographic experiments as explain below.

During the photo-crystallographic experiments, the energy deposited by the laser pulse largely exceed the energy necessary for the LS to HS transition, which results in some heat diffusion and global warming. A modified Wilson plot, known as photo-Wilson plot (Figure S23-S26), is then used to estimate the lase-induced temperature increase due to heat dissipation, in a similar way as described above for the temperature-Wilson plots. From the photo-Wilson plot is possible to calculate the variation of the isotropic temperature factor between the laser-ON data sets and the laser-OFF data sets ( $\Delta B^{ON-OFF}$ )<sup>5</sup>:

$$\ln \left( \frac{I^{ON}}{I^{OFF}} \right) = -2\Delta B^{ON-OFF}(\sin \theta/\lambda)^2 \quad (S3)$$

where,  $I^{ON}$  and  $I^{OFF}$  are the observed intensities of the laser-ON and laser-OFF data sets at delay time. Note that both the thermal-Wilson plot and the photo-Wilson plot were brought to the same scale before calculating the value of  $\Delta B$ . For more information about this topic, the reader is referred to the literature<sup>5</sup>.

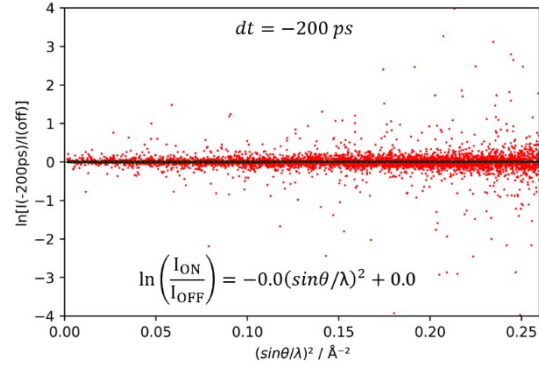

Figure S23. PhotoWilson plots of **FE4** for the reference data set  $dt < 0$ .

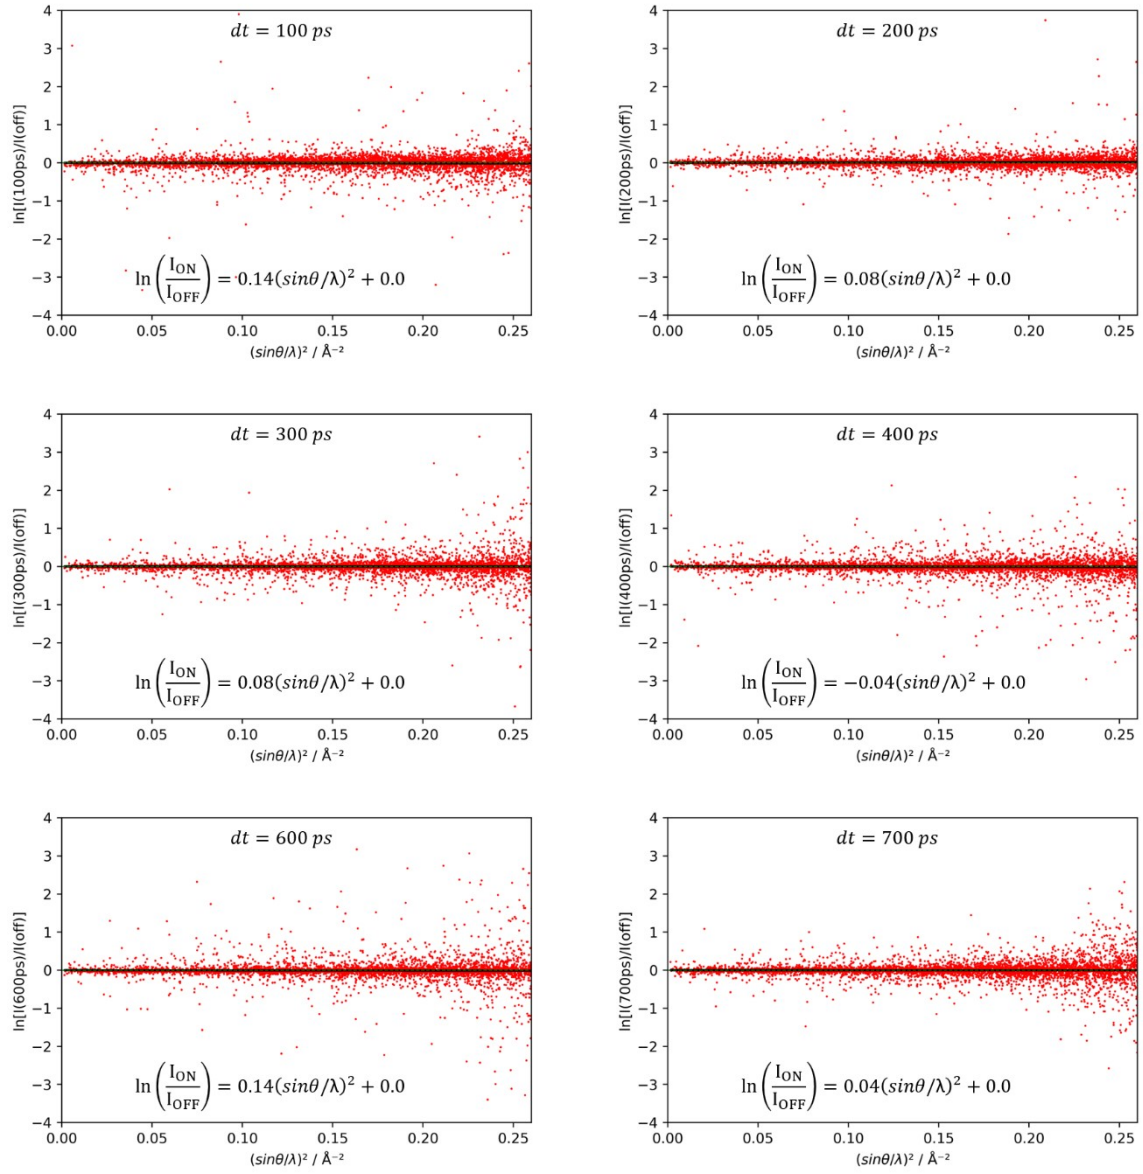

Figure S24. PhotoWilson plots of **FE4** during the photoinduced step.

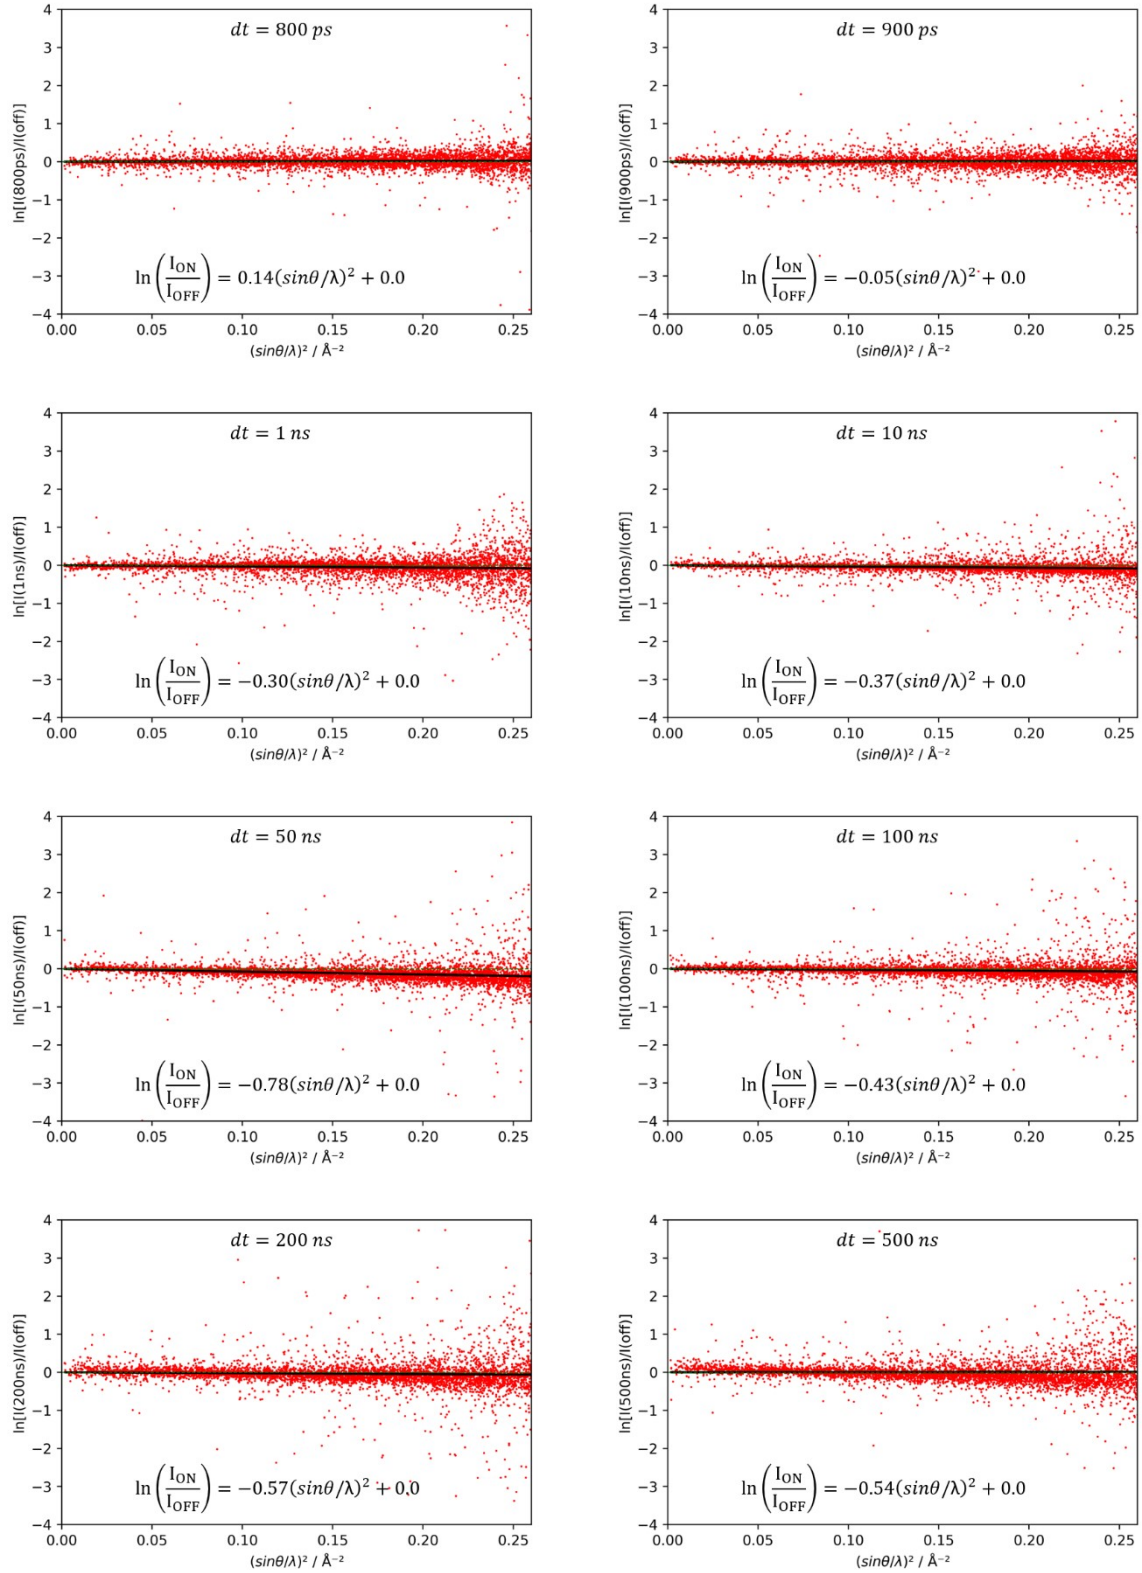

Figure S25 PhotoWilson plots of FE4 during the elastic step.

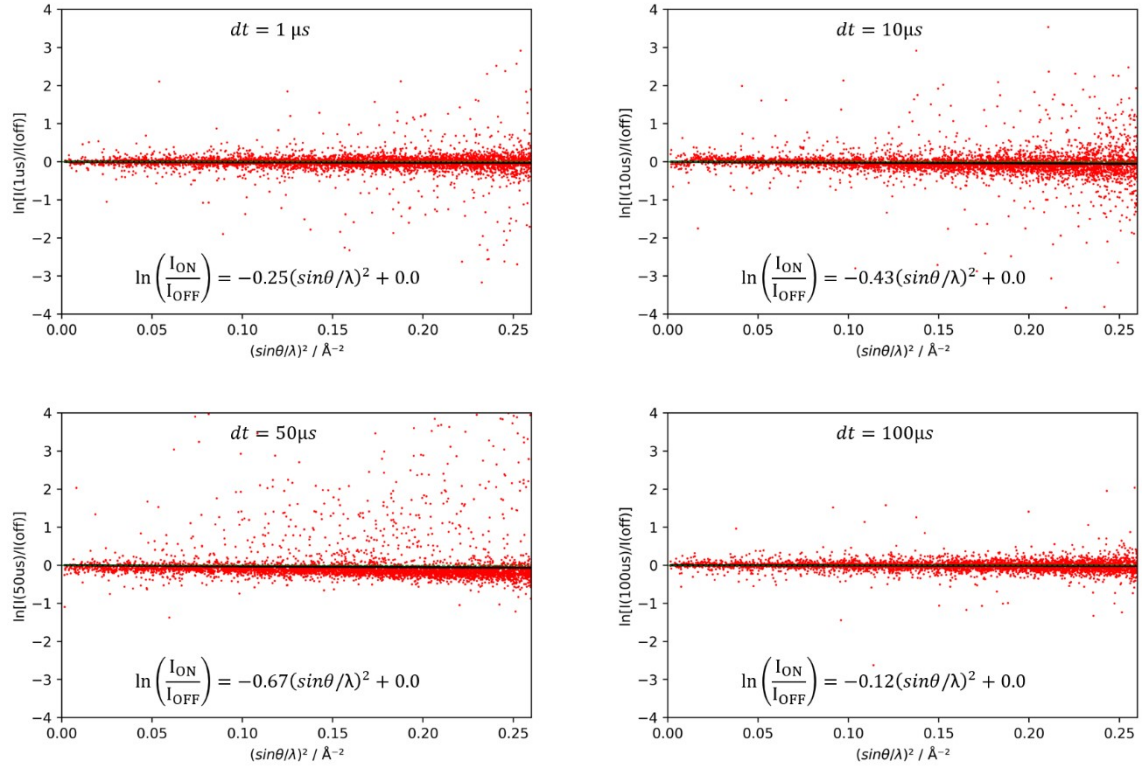

Figure S26 PhotoWilson plots of FE4 during the thermal step.



## References

- 1 B. Schneider, S. Demeshko, S. Neudeck, S. Dechert and F. Meyer, *Inorg. Chem.*, 2013, **52**, 13230–13237.
- 2 M. Marchivie, P. Guionneau, J.-F. Létard and D. Chasseau, *Acta Crystallogr. B*, 2005, **61**, 25–28.
- 3 M. Marchivie, P. Guionneau, J.-F. Létard and D. Chasseau, *Acta Crystallogr. B*, 2003, **59**, 479–486.
- 4 A. J. C. Wilson, *Nature*, 1942, **150**, 152–152.
- 5 M. S. Schmøkel, R. Kamiński, J. B. Benedict and P. Coppens, *Acta Crystallogr. A*, 2010, **66**, 632–636.
